# Supplementary material
Source: PubMed Central journal article supplement (PMC7556152)
Supplement: advancesADV2020002590-suppl1.pdf [file advancesADV2020002590-suppl1.pdf]

**Supplementary Table 1. Summary of Non-Haematological Toxicities**

| <b>Toxicities, n (%)</b>         | <b>All Patients<br/>(N=62)</b> | <b>Bu-Mel<br/>(N=32)</b> | <b>Mel<br/>(N=30)</b> | <b>p-value</b> |
|----------------------------------|--------------------------------|--------------------------|-----------------------|----------------|
| Overall                          |                                |                          |                       |                |
| None                             | 0                              | 0                        | 0                     | < 0.001        |
| Grade 1                          | 5 (8)                          | 0                        | 5 (17)                |                |
| Grade 2                          | 22 (35)                        | 6 (19)                   | 16 (53)               |                |
| Grade 3                          | 35 (56)                        | 26 (81)                  | 9 (30)                |                |
| Grade 4                          | 0                              | 0                        | 0                     |                |
| Diarrhea                         |                                |                          |                       |                |
| None                             | 23 (37)                        | 12 (38)                  | 11 (37)               | 0.90           |
| Grade 1                          | 31 (50)                        | 15 (47)                  | 16 (53)               |                |
| Grade 2                          | 6 (10)                         | 4 (13)                   | 2 (7)                 |                |
| Grade 3                          | 2 (3)                          | 1 (3)                    | 1 (3)                 |                |
| Grade 4                          | 0                              | 0                        | 0                     |                |
| Mucositis                        |                                |                          |                       |                |
| None                             | 15 (24)                        | 1 (3)                    | 14 (47)               | < 0.001        |
| Grade 1                          | 18 (29)                        | 7 (22)                   | 11 (37)               |                |
| Grade 2                          | 25 (40)                        | 20 (63)                  | 5 (17)                |                |
| Grade 3                          | 4 (6)                          | 4 (13)                   | 0                     |                |
| Grade 4                          | 0                              | 0                        | 0                     |                |
| Nausea                           |                                |                          |                       |                |
| None                             | 3 (5)                          | 2 (6)                    | 1 (3)                 | 0.36           |
| Grade 1                          | 13 (21)                        | 4 (13)                   | 9 (30)                |                |
| Grade 2                          | 42 (68)                        | 23 (72)                  | 19 (63)               |                |
| Grade 3                          | 4 (6)                          | 3 (9)                    | 1 (3)                 |                |
| Grade 4                          | 0                              | 0                        | 0                     |                |
| Alanine transaminase elevation   |                                |                          |                       |                |
| None                             | 51 (82)                        | 22 (69)                  | 29 (97)               | 0.010          |
| Grade 1                          | 9 (15)                         | 8 (25)                   | 1 (3)                 |                |
| Grade 2                          | 2 (3)                          | 2 (6)                    | 0                     |                |
| Grade 3                          | 0                              | 0                        | 0                     |                |
| Grade 4                          | 0                              | 0                        | 0                     |                |
| Aspartate transaminase elevation |                                |                          |                       |                |
| None                             | 61 (98)                        | 32 (100)                 | 29 (97)               | 0.48           |

| Toxicities, n (%)          | All Patients (N=62) | Bu-Mel (N=32) | Mel (N=30) | p-value |
|----------------------------|---------------------|---------------|------------|---------|
| Grade 1                    | 1 (2)               | 0             | 1 (3)      |         |
| Grade 2                    | 0                   | 0             | 0          |         |
| Grade 3                    | 0                   | 0             | 0          |         |
| Grade 4                    | 0                   | 0             | 0          |         |
| <b>Bilirubin elevation</b> |                     |               |            |         |
| None                       | 52 (84)             | 27 (84)       | 25 (83)    | 0.92    |
| Grade 1                    | 7 (11)              | 3 (9)         | 4 (13)     |         |
| Grade 2                    | 2 (3)               | 1 (3)         | 1 (3)      |         |
| Grade 3                    | 1 (2)               | 1 (3)         | 0          |         |
| Grade 4                    | 0                   | 0             | 0          |         |
| <b>Neutropenic fever</b>   |                     |               |            |         |
| None                       | 31 (50)             | 10 (31)       | 21 (70)    | 0.005   |
| Grade 1                    | 0                   | 0             | 0          |         |
| Grade 2                    | 0                   | 0             | 0          |         |
| Grade 3                    | 31 (50)             | 22 (69)       | 9 (30)     |         |
| Grade 4                    | 0                   | 0             | 0          |         |

**Supplementary Table 2. Summary of Progression-Free and Overall Survival - Univariate**

| Measure | Group        | 3 yr rate (95% CI) | Median (95% CI) in months | p-value | HR (95% CI) | p-value |
|---------|--------------|--------------------|---------------------------|---------|-------------|---------|
| PFS     | All patients | 56 (42, 68)        | 43.0 (25.7, NE)           | -       |             |         |
|         | Mel          | 41 (22, 59)        | 25.7 (16.5, NE)           | 0.044   | <i>ref</i>  | 0.049   |
|         | Bu-Mel       | 69 (50, 82)        | 44.7 (31.9, NE)           |         |             |         |
| OS      | All patients | 89 (77, 95)        | NE (NE, NE)               | -       |             |         |
|         | Mel          | 87 (65, 96)        | NE (44.0, NE)             | 0.50    | <i>ref</i>  | 0.51    |
|         | Bu-Mel       | 90 (73, 97)        | NE (NE, NE)               |         |             |         |

Abbreviations: CI = confidence interval; HR = hazard ratio; NE = not estimated/not reached; *ref*= reference group.

**Supplementary Table 3. Bayesian piecewise exponential survival time regression model – Progression-Free Survival (N=48 number of events=24)**

| Measure                           | Posterior Quantities |               |                                 |       |                         |
|-----------------------------------|----------------------|---------------|---------------------------------|-------|-------------------------|
|                                   | Mean of $\beta$      | SD of $\beta$ | Posterior 95% Credible Interval |       | Pr( $\beta > 0$   Data) |
| Bu-Mel treatment                  | -0.574               | 0.449         | -1.446                          | 0.311 | 0.102†                  |
| ≥ 60 years of age                 | -0.212               | 0.431         | -1.065                          | 0.607 | 0.312                   |
| ISS Stage III                     | -0.621               | 0.672         | -1.981                          | 0.598 | 0.175                   |
| PR or better to induction therapy | 0.998                | 1.197         | -1.102                          | 3.556 | 0.800                   |

† Moderately significant.

Abbreviation: SD = standard deviation.

Notes: Number of intervals used: 3.

Bu-Mel vs. Mel Mean HR (95% HPD Interval) = 0.62 (0.18, 1.21).
